# Supplementary material for: Enhancing Paternal Support: A Concept Analysis of Social Support for First-Time Fathers
Source: Hindawi journal article supplement (doi:10.1155/2024/2803795), 2024-02-17
Supplement: f1 [file 2803795.f1.doc]

**Supplementary Table 1**

***Enhancing Paternal Support: A Concept Analysis of Social Support for First-time Fathers***

| Author, Year | Antecedents | Attributes | Consequences | Empirical Referents |
| --- | --- | --- | --- | --- |
| Angley et al. (2015) | Social network | Partner support and family support | Parenting competence mediated by lower levels of parental depression.  Increased satisfaction,  self-efficacy and competence  and | Social Support Survey (MOSS Survey)  Parenting Sense of competence Scale  Center of Epidemiological Studies-Depression Scale (CES-D) |
| Backstrom et al. (2017) | Partner's willingness to become parents.  Provider’s ability to respect, include, and appreciate the partner.  Comprehensiveness of parenthood programs | Formal support – father supportive pedagogy  Meet and share with others – instrumental support.  Confirmation of partners’ importance – affirmation | Influence on couple relationship  Increased peer socialization  Increased partner’s involvement  Ability to absorb information when the pedagogy matches the desires and needs of parents. | Individual semi-structured interviews  ‘What professional support have you received for childbirth and parenting?’  ‘What has the support meant to you? |
| Bäckström et al. (2018) | Dyadic consensus (family finances, decision-making and household work)  Dyadic cohesion (exchange of ideas, discussions, ideas)  Dyadic satisfaction (divorce/separation)  Dyadic sensuality (hugging, kissing)  Dyadic sexuality (sexual desire and partners’ attention to sexual needs) | Informal support  Perceived social support. | Higher quality of couple relationship six months post-childbirth  Sense of coherence indicated increased manageability, comprehensibility, and meaningfulness over some time post-birth.  Perceived social support increased between pregnancy and the first week among fathers but decreased after the first week through the first six months post-birth.  Sense of coherence increased despite the decline in marital relationships.  Increased social support for mothers compared to fathers. | Quality of Dyadic Relationship scale  Sense of Coherence scale  The Multidimensional Scale of Perceived Social Support (MSPSS) Dimensions |
| Backstrom et al. (2021) | Social network  Homogeneity  Closeness/ proximity  Trustworthiness  Togetherness  Consensus | Informal support  Emotional; understanding, listening, remaining calm, normalization, sharing.  Informational; Information on infant needs, breastfeeding, baby buggies, car seat safety, and parental leave options were preferred.  Appraisal was perceived as, learning, and sharing behaviours. | Facilitates understanding of how to prepare for childbirth and infant care.  Physical, practical, and mental preparedness for childbirth and infant care | N/A |
| Bonifácio et al. (2020) | The willingness of the provider and receiver  Technological platform | Online – SMS messages in prenatal care  Feasibility, flexibility, acceptability | Greater participation in the prenatal consultations  Labor companionship  Postpartum care of partners  Soft technology, inexpensive  Improved maternal health | Skype interviews |
| Bost et al. (2002) | Social network size  Childbirth context  Frequency of contact with family members  Help-seeking behavior  Coexisting social systems | Partner support  Family support- parents  Other support (acquaintances and clergy)  Relationship with spouse- reciprocity  Point of care – timeline (pregnancy, childbirth, and early parenting years) | Declining friends and network relationships after the child's birth.  Husbands reported a decrease in the number and frequency of social contacts in comparison to mothers.  Give-and-take relationships declined over the childbearing period for mothers compared to an increase in fathers’ relationships.  Increased feelings of satisfaction correlated with depression scores. | Interviews  Inventory of social support protocol elicited social networks and support from network members.  The Center for Epidemiological Depression scale (CDS) was used to study the depression patterns of change in social networks and support variables over 24 months postpartum |
| Brown (1986) | The social network characteristics  Individual characteristics of previous chronic illness, stressful events, age, employment status, family income and satisfaction | Informal support from partners and others  Interpersonal support | Illness dimension (headache, feelings, difficulty sleeping)  Wellness dimension (increased self-confidence and increased energy)  Couvade syndrome for fathers (male symptomology during pregnancy)  Stressful events such as marital problems, financial problems and moving. | Support Behaviors Inventory, Stress Amount Checklist, and Health Responses Scale |
| Carlson et al. (2014) | Mother- centric services, not an ideal service for fathers  Parental leave- family leave  Practitioners friendly but system not friendly  Likeminded peer support  Attitudes of professionals – targeted as insurance-specified care – follow up.  A diverse group of fathers (stay-at-home, single dads, cohabiting) | Formal support  Both professionals’ and fathers’ experiences, along with mothers (multiple lenses)  Antenatal programmatic classes  Community groups- peer groups  Financial support- parental leave- family leave  Father support across all domains  Accessibility of resources  Availability of resources  Effectiveness of support.  Congruence mismatch  Professional support was an alternative to familial belonging in families lacking extended support, “big help.”  Community programs | Sense of connection  Belongingness  Less utilization  Lack of motivation  Lack of father friendliness  Also, long-term implications on issues regarding intimate partner violence, perinatal and post-natal maternal health, perinatal fetal health, and early childhood exposure to domestic violence (CEDV)  Peer support in formal groups was a factor in wading loneliness among fathers through like-mindedness.  “Being in a dad curriculum” increases parenting and child development knowledge and skills.  Desires to include budgeting, activities with the child, job searching, counselling, and legal information. | Sadusky’s (2010) Assessment Guide |
| Chong et al. (2017) | Receiver's and provider's perspectives on gender  Contact with parents’ support!  Personal factors  Social factors  Environmental factors | Informal support- parents and parents-in-laws  Proximity and contact/ closeness  Geographical distance  Instrumental support – being helpful and supportive.  Emotional support- love, care, understanding,  Appraisal support – reassurance, showing approval, agreeing. | Contact with parents and in-laws was not related to emotional support as it was to mothers.  Differences in seeking and valuing support among fathers were related to masculine gender expectations. | Social Support Inventory measured emotional support from parents and parents-in-law of both parents. |
| Cronenwett (1985) | Network size, percentage of kin in their network  Boundary density  Perception of the social support | Emotional and instrumental from family and relatives  Informational and appraisal from a more extensive network/ professional  Partner support  Support from family, friends, and relatives | Fathers positively correlated parenting skills with a more extensive network of kin, relatives and family compared to mothers.  Quality of relationship with the spouse  Confidence in the ability to cope with parenting.  Satisfaction with spousal and infant care  Support for the parenting role | Social network Inventory (SNI)  The post-partum Self–Evaluation questionnaire |
| Erikson and Eriksson (2013) | Need for support.  Online network  The willingness of both the provider and receiver | Informal support – informal online chats, experience-based internet forums  Peer support  Reciprocity  Skillfulness  Experience  “Pay it forward principle.”  Continuity  Consistency  Flexibility | Similar experience  Sharing and caring  Increased awareness of caring roles  Self-reflection  Meets the gender and generational context.  Increased motivation  Writing in the forum to ease concerns- being heard with no ambition of being therapeutic | Forum chat analysis  What types of caring activities can be identified as being communicated among fathers in the forum? |
| Fagan and Bernd (2007) | Size of the father’s social network | Support from the father’s parents for the young father’s involvement  Support from the mother’s parents for the young father’s involvement was less | Significant caregiving involvement among fathers  Decreased parenting stress. | Parental Childcare Scale  Social Support  Questionnaire |
| Fletcher and St George (2011) | Fathers to fathers’ support  Online chat space, virtual space, safe space  Humor and self-disclosure through storytelling  Need of fathers/gender relevance (fathers’ resources)  Self-disclosure  Accessibility  Mood tracker- a therapeutic alliance | Informational support  Emotional support/appraisal support  Government-supported – informal, peer support on an online forum  SMS4dads text message perinatal support  Self-help group- hearing from the horse’s mouth concept | Increased visibility of fathers  Imparted information with considerate intention to support.  Supporting fathers’ self-identity and efficacy  Normalizing- emotional support  Increased knowledge, engagement- participation  Acknowledgement of vulnerability  Unique space to share fears.  Father-partner relationship supported. | Asynchronous online chat messages |
| Fletcher et al. (2019) | Virtual environment  Provider, syncing information to needs.  Normalization  Prompts to interact.  Provision of a safety net | Text-based support – SMS 4dads  Technology based intervention.  Psychological safety  Safety net (a mood tracker)  Appraisal and affirmation support  Credibility and accessibility | Increased knowledge  Increased confidence  Ability to cope  Role oriented ness.  Connectedness  Facilitated active, experiential learning. | Semi-structured interviews |
| Gao et al. (2009) | Family network  Family structure- extended families  Social climate- Context- cultural norms  Geographical location  Newborn gender | Family support (mother-in-law)  Perception of support  Proximity among family members and close ties  Availability  Cultural influences- doing the month, elder support | Mother-in-law is seen as a supporter and strain on the relationship of new parents primarily related to the sex of the baby.  Paternal depression is as significant as maternal depression.  Couples’ resiliency correlated to social support. | The Edinburgh Postnatal  Depression Scale (EPDS)  The Chinese version of the  Perceived Stress Scale (PSSS)  The Social Support Rating  Scale (SSRS) |
| Halle et al. (2008) | Fathers’ diversity  Lack of exposure to other fathers  To transform expertise level to engaging level  Emotional distress  Attitudes and behaviour mismatch between the professionals and fathers. | Partner support  Practical and emotional support perceived as essential support by fathers from partners.  Lack of interpersonal support and professional support  Emotional and practical help  Informal sources: books, pamphlets, magazines, and TV | Caring-regulation, Caring-stimulation  Less confident  Fathers’ motivation to be involved in parenting is open to conflicting interpretations by the mother. | A Likert scale for responses on fathers’ access to support during the antenatal and postnatal period was assessed through questionnaires. |
| Hildingsson and Sjoling (2011) | Partner's perception of presence during antenatal visits  Expectations of partners and professionals  Emotional aspects of prenatal programs | From people close to the prospective father  Professional support in mid-pregnancy  Less support from providers like midwives | Partner was perceived as a significant supporter for fathers across pregnancy, childbirth and one year after birth. | Longitudinal survey |
| Hrybanova et al. (2019) | Child health nurses  Commitment, availability, and adaption to the fathers' needs  Sensitive, nonjudgmental  Fathers’ different cultural and social backgrounds  Parental groups  Home visits  . | Practical support —hands-on advice  Emotional aspects (sensitive, understanding/calm)— welcome approach – feelings of security.  Informational (information on bf and baby care) | Positive birth experience  Facilitate adaptation to the father’s role.  Empowerment  Lack of commitment, availability and adaptation to fathers’ needs was experienced negatively. | The Father Perceived Professional Support scale (FaPPS scale) |
| Hughes et al. (2020) | Sources of support  Provider’s gender  Perceptions  Help-seeking behavior  Context- prenatal period  Income, age, paternal leave policies  Work expectations as barriers | Informal family and friends’ support | Parenthood evokes psychological distress in fathers.  Trajectories of well-being and differences in mothers and fathers  In the father’s, families support was to decrease anxiety-depressive symptoms. | Multidimensional Scale of Perceived Social Support (MSPSS).  Measures sources of social support but does not mention the attributes |
| Huusko et al. (2018) | Providers attitudes  Receiver’s perception of professional support  Antenatal classes  Calm environment  Common sense was essential, and fathers will learn in time | Professional support sources – midwives  Informal support- family, friends, and internet  Emotional support understanding, sensitive- listening, eye-to-eye contact, remaining calm.  Available – less time constraint  Informative support | Lack of awareness of their needs  Experience of being excluded.  Fathers’ responsibility in being sensitive to themselves, fathers’ self-blame for not requesting help.  If supportive of women, support was considered supportive. | The Father Professional-Support" (FaPPS) scale  The validation of FPPS should include professionals’ ability to strengthen social support for first-time fathers and the ability to support the mother. |
| Lee et al. (2018) | Lack of interventions for fathers | Father-inclusive program  Professional expertise | Fathers’ mental health  Partner relationship  Parenting self- Awareness | N/A |
| Mbekenga et al. (2011) | Social network  Social positioning of mothers versus fathers  The social climate of respect for elders  Poverty  Poor social relations between mothers  Social norms  Gender power relations | Authoritative informal supports  Informal support as the decision-makers  Practical help from elderly fathers  Information guidance- sexual behaviour  Financial support  Reciprocity | Dilemma  Uncertainty  Men not positioned as recipients of informal supports.  Poverty and non-adherence to social norms related to fewer supports | Focus group discussions |
| Montigny et al. (2006) | A period of isolation  Less support  Perceived versus received support. | Informal/ affective  Proximity  Professional/formal/expertise  Partner support was the most important source of support. | Parental efficiency  Decrease in parental anxiety.  Empowerment  Enabling  Collaboration  Intimacy  Parenting alliance | Social Support Questionnaire  A French version of Reece’s Parent Expectations Survey (PES)  Help-giving Practices Scale  Parent/Care Provider Collaboration Inventory  Abidin’s Parenting Alliance Inventory |
| Mrayan et al. (2016) | Willingness and preparedness of the supporter  Receiver's needs and congruence  Modernity versus traditional views | Family support – parents' support  Credible informational support  Perception of the receiver  Congruence/mismatch of support  “Too much support”  Practical help and informational support | Social support was redundant and unhelpful, and social visiting was considered a barrier to privacy and intimacy.  Conflict with the modern values and views of new fathers, who valued professional care better than formal advice from parents. | Semi-structured, in-depth interviews |
| Oommen et al. (2011) | Fathers desire  Fathers’ presence 24/7  Received support as perceived by fathers.  Unhurried, holistic, empathetic, individualized, and personal care | Professional support  Affectional support (e.g., ‘health-care workers treated you at a personal level’)  Affirmational support (e.g., ‘you received information and instructions related to infant care)  Concrete aid (e.g., ‘I received concrete directions on feeding the infant and measures to facilitate the same’). Directions for infant feeding  Directions for how to hold the infant.  Methods to calm a wailing child.  Guidance in interpreting infant communication Practical instructions in infant care | A significant association between presence and reporting support was found.  More confidence  Increased sense of responsibility  Family-centered care | Family Functioning, Health and Social  The support (FAFHES) instrument is based on Kahn’s (1979) social support theory.  Questions addressed affirmational, affectional, and concrete aids provided by nurses in the unit as reported by mothers and fathers. |
| Price (2001) | Health visitor-facilitated support  Program provided.  Perception of fathers  Location and accessibility  Social context | Dad’s evening group – peer support  Feedback – appraisal support after video sessions  Informational support on testicular cancer, self-examination  Financial and professional efficiency  Desirability to more talk time  Convenient time and suitable place | Promotes male health.  Formation of friendships  Facilitated interactions among local networks.  Fathers from vulnerable groups had a low turnout in attendance | Evaluation forms  Not applicable |
| Rominov et al. (2018) | Fathers’ awareness  Barriers such as perceptions, sociocultural norms  Help-seeking is perceived as a weakness.  Stigma  Fathers’ perspectives  Lack of preparation and awareness  “Information Age” challenges  Time management skills  Couple relationships, conflict, dynamics with extended family relationships | Formal support  (Health professionals, midwives, hospitals, home visits, infant first aid classes)  Informal support—family, friends, relatives, online  Peer support was the common source.  Emotional and practical support from social networks.  Informational support  Role of co-parents unacknowledged.  Experiences of support, support needs, barriers to support, facilitators to support, and timing of support | Positive and targeted engagement – increases fathers' trust, decreases fear, and increases fathers' value of themselves as co-parents. | Individual semi-structured face-to-face or telephone interviews |
| Sevigyny et al. (2021) | Formal support —public health nurse visits and father-led meetings  Mobile apps – unhelpful  Desired options for access – video library, father-only classes, meeting with other fathers  Push notifications and formal mentorship was negatively rated. | Professional support  Sources – midwives  Peer support from other fathers in the class, less midwife support  Exclusion by themselves and midwives, partners, friends, and family  Desired- helpfulness  availability  Attributes of the providers- program—good informational advice- expertise, knowledge, timely, relevant  Online- convenient  Skeptical  Helpfulness of the support | Reported sources of support  Desired sources of support  The workplace is not a preferred space for new fathers.  Father-specific interventions at one time is less helpful in transitioning.  Fathers interact less than mothers and interact differently than mothers using humor. | Online survey |
| Sherriff et al. (2014) | Provider and receiver knowledge, attitude, and context | Professional support  Relevant information, consistency across all settings, accessible delivery  The positive attitude of parents  The attitude of other family members  Validation as  Affirmational support  Practical support | Reduce anxiety.  Increase problem-solving abilities.  Awareness of breastfeeding challenges  Infant developmental milestones  Maternal postnatal depression  Continuation of breastfeeding | Not applicable |
| Shorey et al. (2017) | Geographical context (post-discharge)  Cultural influences  Fathers’ attitudes related to the expectations of society for infant care as mothers’ roles.  Support from extended families  Distinct maternal and paternal roles  Unawareness of available resources  Ambiguity with the parental values and expectations of traditional practices and the fathers’ desires | Formal informational supports  Preference for mobile health applications – electronic media – educational sessions  Informal support of parent’s availability  Geographical context (post-discharge)  Cultural influences    Support: needs, sources, experience, and attitude.  Continuity of professional supports post discharge | Increased parenting self-efficacy and satisfaction  Chance of fathers seeing themselves as a valued co-parent  A few fathers voiced that they engaged in self-talk, talked to their babies, or smoked more when they felt stressed. | A semi-structured interview guide was used to conduct face-to-face interviews.  “Tell us about your experience when you first got home with your wife and baby. How did you feel?”  “How do you find your preparedness to support your wife and care for your baby after the hospital discharge?” |
| Shorey et al. (2018) | Space to learn.  Provider’s expertise  Receivers’ behaviours, perceptions, change in attitudes.  Social environment- Antenatal and postnatal environments  Compartmentalized programs | Informational support-focused interventions  Method of delivery (how)- face to face  Timepoint of intervention (when)  Short term follows up follow-up (how long)  Efficacies of the interventions as paternal outcomes | Paternal depression  Father-infant interaction  Spousal relationship  Parenting self-efficacy  Parental satisfaction  Fathers’ involvement  Paternal knowledge and attachment | NA |
| Somers-Smith (1999) | The decision to attend and support partners.  Lack of confidence, the uncertainty of fathers  Mothers’ gatekeeping  Vicious cycle | Partner support  Support expectations  Received support from fathers.  Perceived support by fathers to mothers | Support during childbirth evoked positive responses from mothers.  Less support increased stress during childbirth  Lack of confidence, the uncertainty of fathers | Semi-structured-  Interviews |
| Stewart et al. (2017) | Support needs  Homogenous network  Continuity across Pregnancy, childbirth and postpartum  Lack of proximity to informal supports  Caring for an infant without help is overwhelming.  Reciprocity, respect, support, and religion are valued among immigrants.  Unprofessional attitudes by service providers | Family support was prioritized over friends.  Culturally sensitive support needs  Instrumental support – financial resources, obtaining advice, information, and feedback.  Social network- similar background  Informational support- same language  Emotional support from peers in their community, culturally safe environment by providers | Loneliness, feelings of belongingness  Easy integration into the host country  Disparities between the native and the host country’s parenting values were verbalized (Collectivism to individualism).  Being ignored by professionals and caregivers due to language barriers. | The personal resource questionnaire was used to measure support types and sources, support needs and satisfaction with support.  Emotional support seeking subscale.  Informational support seeking subscale |
| Uengwongsapat (2020) | Societal norms  Culture  Homogeneity  Vulnerability – young parenthood | Family support  Emotional support: love, attention, sympathy, and empathy from loved ones.  Appraisal support: Social support networks help first-time fathers understand the life events around them. | Looked down upon by society for early parenthood.  Lack of support—increased anxiety  Social acceptance is a significant problem.  Gender role expectations, more significant social conflicts  Effective adaptation of paternal role | In-depth interviews |
| Vallin et al. (2019) | Medical professionals’ attitudes and behaviours  Lack of sensitivity and  Honesty  Dissatisfaction  Marginalized  Frustration | Professional support  Effective communication  Emotional support- arms around shoulders | Fathers’ empowerment  Positive delivery experience  A strong relationship between received support and psychological well-being. | N/A |
| Wells and Aronson (2021) | Receivers’ perception  Professional support through prenatal classes. | Partner support – significant for emotional support  More support during childbirth  compared to pregnancy and post-birth. | Fewer depressive symptoms among first-time were reported.  Fathers who receive social support from their partner and have a higher income also are less likely to report depressive symptoms in all models. | Facebook-advertised anonymous online survey  Edinburgh Postnatal Depression Scale was used to detect depressive symptoms (≥10 points) |
| White et al. (2018) | Seek and offer support.  Support seeking  Support giving  Supporting mums, health professionals and other supports  Social connection – joining in, conversational, use of humor | Informational support  Breastfeeding-focused app-based online forum- Milkman app  Peer support (father to father)  Desirability  Accessibility  Anonymity  Mac daddy- peer facilitator  Relevant and flexible | Engaging and supporting fathers  Companionship, anonymity  A popular and preferred support  Balancing work commitments  Joining in  Responding  Sharing  Empowerment  Increased knowledge | Not applicable |
| Widarsson et al. (2012) | Invisibility of fathers  Social network  Need-based support by the providers.  Mismatch  Fathers are willing to be present.  Providers are not willing to provide accordingly. | Professional expertise- lacks psycho-emotional support  Partner support prioritized.  Anchorage support- support from older generations  Peer emotional support  Tangible- psychological and physical support in terms of welfare, insurance  Internet support | Customized individual support.  Client-centered, non-template care  Gender differences in care | Focus group and individual interviews |
| Yang et al. (2020) | Parenting teamwork, known as “co- parenting.”  Gender  Societal norms | Informal supports  Professional supports  Verbal encouragement  Parenting skills assistance  Coparenting relationships | Parental  role competence and satisfaction for both mothers and fathers  Fathers had significantly lower scores on PSSS than mothers | Parenting Sense of Competence Scale, Perceived Social Support Scale, and socio-demographic questionnaire.  Perceived Social Support  Scale (PSSS). |
| Yu et al. (2012) | Needs of fathers  Received and perceived support | Partner support  Medical staff support | Increased marital intimacy.  Better father-child attachment  Social dysfunction  Increase in depression symptoms.  Strained family relationships | Social Support Scale (SSS)  Marital Intimacy scale  Chinese Health Questionnaire (CHQ)  Paternal Attachment Inventory (PAI) |
